# Supplementary material for: Threshold-Based Allocation Policies for Inventory Management of Red Blood Cells
Source: Atypon-hosted journal article supplement (doi:10.1287/msom.2017.0650), 2017-12-12
Supplement: msom.2017.0650-sm.pdf [file msom.2017.0650-sm.pdf]

## Online Appendix

The online appendix contains the proofs of all results in the paper.

### A. Proofs of Results in Section 4 and Appendix A

*Proof of Proposition 1.* From Parlar et al. (2011) the limiting distribution of  $W$  has density

$$f(x) = \begin{cases} f(0)e^{-(\lambda-\mu)x}, & 0 < x < \gamma, \\ f(0)e^{\mu\gamma-\lambda x}, & x \geq \gamma, \end{cases} \quad \text{where, } f(0) = \begin{cases} \frac{\lambda(\lambda-\mu)}{\lambda-\mu e^{-(\lambda-\mu)\gamma}}, & \lambda \neq \mu, \\ \frac{\lambda}{1+\lambda\gamma}, & \lambda = \mu. \end{cases} \quad (34)$$

The outdates occur at instances when  $W$  hits zero, the long-run average rate of which is  $f(0)$ . Therefore, we have  $q^F = f(0)/\lambda$  which yields (4). To obtain  $A^F(\cdot)$ , note that the remaining age of units at the time of transfusion is embedded at epochs right before jumps on a  $W$  sample path when  $0 < W < \gamma$ . Thus, from (34) and using the PASTA property of the demand process we have for  $x < \gamma$ ,  $A^F(x) = \lim_{t \rightarrow \infty} P(\gamma - x \leq W(t) < \gamma) / P(0 < W(t) < \gamma) = \int_{\gamma-x}^{\gamma} f(y)dy / \int_0^{\gamma} f(y)dy$ , which after simplification gives (5). Using (5) the derivation of (6) is straightforward. For the case where  $\lambda = \mu$ , the results are obtained by letting  $\lambda \rightarrow \mu$  and applying L'Hôpital's rule.  $\square$

*Proof of Proposition 2.* We only give a proof for the case with  $\lambda/\mu > 1$ . The case with  $\lambda/\mu < 1$  can be shown similarly and the case with  $\lambda = \mu$  is trivial noting that  $\lambda q^F = \mu \ell^F = \mu/(1 + \mu\gamma)$  and  $E[A^F]$  is a constant. Fix  $\lambda/\mu > 1$ . Then using the expression for  $q^F$  in (4) and the identity in (3) relating it to  $\ell^F$  we have

$$\mu \ell^F = \lambda q^F - (\lambda - \mu) = \frac{\mu(\lambda/\mu - 1)e^{-\mu(\lambda/\mu-1)\gamma}}{\lambda/\mu - e^{-\mu(\lambda/\mu-1)\gamma}} \leq \frac{\mu(\lambda/\mu - 1)e^{-\mu(\lambda/\mu-1)\gamma}}{\lambda/\mu - 1} = \mu e^{-\mu(\lambda/\mu-1)\gamma},$$

which goes to zero exponentially fast as  $\mu \rightarrow \infty$ . To see this, note that  $\mu e^{-\mu(\lambda/\mu-1)\gamma} \leq C_1 e^{-C_2\mu}$  for constants  $C_1, C_2 > 0$  as long as  $C_1 C_2 \leq \mu(\lambda/\mu - 1)\gamma$ , which clearly holds for sufficiently large  $\mu$ . The results for  $E[A^F]$  can be verified easily using (6).  $\square$

*Proof of Lemma 1.* We first derive  $\hat{h}(\theta)$ . Note that with probability  $e^{-\lambda T}$ , we have  $W(0) > T$ , i.e., the first jump is greater than  $T$  and hence  $\tau = 0$ . Conditioning on  $W(0)$  we have

$$\hat{h}(\theta) \equiv E[e^{-\theta\tau} | W(\tau) > T] = \frac{E[e^{-\theta\tau} \mathbf{1}_{\{W(\tau) > T\}}]}{P(W(\tau) > T)} = \frac{\int_0^T \hat{h}_x(\theta) \lambda e^{-\lambda x} dx + e^{-\lambda T}}{\int_0^T \hat{h}_x(0) \lambda e^{-\lambda x} dx + e^{-\lambda T}}.$$

Next, we consider  $\hat{g}(\theta)$ . Note that given  $W(\tau) = 0$ , the first jump must be some  $x \leq T$ . Again by conditioning on  $W(0)$  we get

$$\hat{g}(\theta) \equiv E[e^{-\theta\tau} | W(\tau) = 0] = \frac{E[e^{-\theta\tau} \mathbf{1}_{\{W(\tau)=0\}}]}{P(W(\tau) = 0)} = \frac{\int_0^T \hat{g}_x(\theta) \lambda e^{-\lambda x} dx}{\int_0^T \hat{g}_x(0) \lambda e^{-\lambda x} dx}.$$

Computing the integrals and noting that  $P(W(\tau) = 0) + P(W(\tau) > T) = 1$ , gives the results.  $\square$

*Proof of Proposition 3.* Let  $t = 0$  be the time the outdate occurs. Then  $W$  has just hit zero, causing a jump with size  $W(0) \in (0, \infty)$  independent of the history of the process. If  $W(0) > T$ , then the residual busy period is over with  $R = 0$ . Otherwise, the residual busy period ends the first time  $W$  upcrosses  $T$  (see Figure 1 for a realization of  $R$ ). However, before this happens,  $W$  may hit zero as new outdates may occur. Therefore, the probability that there are  $M = m \geq 0$  outdates during the residual busy period is equal to the probability that  $W$  hits zero  $m$  times before upcrossing  $T$ . Note that using the strong Markov property of  $W$ , every time it hits zero the process regenerates and a new i.i.d. cycle starts. Also, the probability of hitting zero before crossing over  $T$  for each cycle is  $p \equiv P(W(\tau) > T)$ . Therefore, we have  $P(M = m) = (1 - p)^m p$ . From Lemma 1, it then follows for the length of the residual busy period given the number of outdates, that  $\hat{r}_m(\theta) \equiv E[e^{-sR} | M = m] = \hat{h}(\theta) (\hat{g}(\theta))^m$ . Removing the condition on  $M$ , we get the LT of the length of the busy period:

$$\hat{r}(\theta) \equiv E[e^{-\theta R}] = \sum_{m=0}^{\infty} P(M = m) E[e^{-\theta R} | M = m] = \sum_{m=0}^{\infty} (1 - p)^m p \hat{h}(\theta) (\hat{g}(\theta))^m = \frac{p \hat{h}(\theta)}{1 - (1 - p) \hat{g}(\theta)},$$

as claimed.  $\square$

*Proof of Proposition 4.* Each busy period starts with a fresh unit arriving at an empty system. Let  $t = 0$  be the start of the busy period, then  $W(0) = T$ . The busy period ends the first time  $W$  upcrosses  $T$ . Each time  $W$  hits zero before this happens, a unit is outdated. Note that starting from level  $T$  two cases can occur: either  $W$  upcrosses  $T$  before hitting zero, with probability  $P_T(W(\tau) > T) = \hat{h}_T(0)$ , or it first hits zero, with probability  $P_T(W(\tau) = 0) = \hat{g}_T(0) = 1 - \hat{h}_T(0)$ . In the first case, the busy period ends with no outdates occurring during it, so  $P(N = 0) = \hat{h}_T(0)$ , and the LT of the conditional length of the busy period is  $\hat{z}_0(\theta) \equiv E[e^{-\theta Z} | N = 0] = E_T[e^{-\theta \tau} | W(\tau) > T] = \hat{h}_T(\theta) / \hat{h}_T(0)$ . In the second case after  $W$  hits zero, by the strong Markov property of  $W$ , a new i.i.d. cycle independent of the history of the process starts and the time until  $W$  upcrosses  $T$  has the same distribution as a residual busy period. Thus, for  $n > 0$  we have  $P(N = n) = \hat{g}_T(0) P(M = n - 1) = \hat{g}_T(0) p (1 - p)^{n-1}$ . That is, to have  $n$  outdates during the busy period, starting from  $W(0) = T$ ,  $W$  must first hit zero and then before crossing level  $T$  it must hit zero  $n - 1$  ( $n \geq 1$ ) additional times. It follows that  $\hat{z}_n(\theta) \equiv E[e^{-\theta Z} | N = n] = E_T[e^{-s\tau} | W(\tau) = 0] E[e^{-\theta R} | M = n - 1] = (\hat{g}_T(\theta) / \hat{g}_T(0)) \hat{r}_{n-1}(\theta)$ . Substituting from (25) we get the result for the  $n > 0$  case in (28). Finally, by the same argument and again due to the strong Markov property of the process  $W$ , given  $W(0) = T$  we have  $Z = \tau + \mathbf{1}_{\{W(\tau)=0\}} R$ . It follows that

$$\begin{aligned} \hat{z}(\theta) &\equiv E[e^{-\theta Z}] = E_T[e^{-\theta \tau} \mathbf{1}_{\{W(\tau) > T\}}] + E_T[e^{-\theta(\tau+R)} \mathbf{1}_{\{W(\tau)=0\}}] \\ &= E_T[e^{-\theta \tau} \mathbf{1}_{\{W(\tau) > T\}}] + E[e^{-\theta R}] E_T[e^{-\theta \tau} \mathbf{1}_{\{W(\tau)=0\}}] = \hat{h}_T(\theta) + \hat{r}(\theta) \hat{g}_T(\theta). \end{aligned} \quad (35)$$

Substituting  $\hat{r}(\theta)$  from (26) we get (29) which completes the proof.  $\square$

*Proof of Proposition 5.* The proof is elementary and hence omitted.  $\square$

## B. Proofs of Results in Section 5

### B.1. Proofs of Theorems 1 and 2

*Proof of Theorem 1.* We first show that the cdf of  $\tilde{S}_{2,k}$  converges to that of  $\tilde{S}_2$  for all  $x \in [0, \infty)$ . Then, the second part follows from the continuity theorem for Laplace transforms (see Feller 2008, page 431). Let  $A_j$  denote the event that “the unit is allocated during the  $j^{\text{th}}$  idle period” and let  $\bar{A}_k$  denote the event that “the unit is not allocated during any of the first  $k$  idle periods”. Note that  $\cup_{j=1}^k A_j = \{\tilde{S}_2 < U_k\}$  and  $\bar{A}_k = \{\tilde{S}_2 \geq U_k\}$ . Now consider the cdf of  $\tilde{S}_{2,k}$ . Using (13) we have

$$\begin{aligned} P(\tilde{S}_{2,k} \leq x) &= \sum_{j=1}^k P(\tilde{S}_{2,k} \leq x | A_j) P(A_j) + P(\tilde{S}_{2,k} \leq x | \bar{A}_k) P(\bar{A}_k) \\ &= \sum_{j=1}^k P(\tilde{S}_2 \leq x | A_j) P(A_j) + P(U_k \leq x | \bar{A}_k) P(\bar{A}_k). \end{aligned} \quad (36)$$

Letting  $k \rightarrow \infty$  in (36), the last term on the RHS vanishes. To see this note that  $\lim_{k \rightarrow \infty} P(U_k \leq x | \bar{A}_k) P(\bar{A}_k) = \lim_{k \rightarrow \infty} P(U_k \leq x, \bar{A}_k) \leq \lim_{k \rightarrow \infty} P(U_k \leq x) = 0$ , where the last equality holds because  $U_k$  is the  $k^{\text{th}}$  renewal epoch of a delayed renewal process. Thus, for any  $x \in [0, \infty)$  we have  $\lim_{k \rightarrow \infty} P(\tilde{S}_{2,k} \leq x) = \sum_{j=1}^{\infty} P(\tilde{S}_2 \leq x | A_j) P(A_j) = P(\tilde{S}_2 \leq x)$ . Note that since  $x$  is finite the last equality follows even if the cdf of  $\tilde{S}_2$  is improper. Hence, the proof is complete.  $\square$

*Proof of Theorem 2.* It suffices to show that for each  $\epsilon > 0$ , we have  $\sum_{k=1}^{\infty} P(|S_{2,k} - S_2| \geq \epsilon) < \infty$ . Then from the Borel-Cantelli Lemma we have  $P(|S_{2,k} - S_2| \geq \epsilon \text{ i.o.}) = 0$  implying that  $P(S_{2,k} \rightarrow S_2) = 1$  (Billingsley 2008, page 70) as claimed. To this end, we consider the random variable  $\tilde{S}_2$  defined on a probability space  $(\Omega, \mathcal{F}, P)$  and decompose the sample space  $\Omega$  for  $k \geq 1$  as

$$\begin{aligned} C_{1,k} &\equiv C_{2,k} \{\omega \in \Omega; \tilde{S}_2(\omega) \leq U_k(\omega)\}, & C_{2,k} &\equiv \{\omega \in \Omega; \gamma - T \leq U_k(\omega) < \tilde{S}_2(\omega)\}, \\ C_{3,k} &\equiv C_{4,k} \{\omega \in \Omega; U_k(\omega) < \gamma - T \leq \tilde{S}_2(\omega)\}, & C_{4,k} &\equiv \{\omega \in \Omega; U_k(\omega) < \tilde{S}_2(\omega) < \gamma - T\}, \end{aligned}$$

such that  $\cup_{i=1}^4 C_{i,k} = \Omega$  for any  $k \geq 1$ . Note that since  $S_{2,k} = \min(\tilde{S}_{2,k}, \gamma - T)$ , for any  $\omega \in C_{1,k} \cup C_{2,k}$  we have  $S_2(\omega) = S_{2,k}(\omega)$ . Thus, for each  $\epsilon > 0$ ,  $\{|S_{2,k} - S_2| \geq \epsilon\} \subseteq C_{3,k} \cup C_{4,k}$ , implying that for all  $k \geq 1$ ,  $P(|S_{2,k} - S_2| \geq \epsilon) \leq P(C_{3,k} \cup C_{4,k})$ . Therefore,

$$\sum_{k=1}^{\infty} P(|S_{2,k} - S_2| \geq \epsilon) \leq \sum_{k=1}^{\infty} P(C_{3,k} \cup C_{4,k}) \leq \sum_{k=1}^{\infty} P(U_k \leq \gamma - T).$$

It remains for us to show that  $\sum_{k=1}^{\infty} P(U_k \leq \gamma - T) < \infty$ . Indeed, defining the stopping time  $\sigma = \inf\{n \geq 1; U_n > \gamma - T\}$  we have  $\sum_{k=1}^{\infty} P(U_k \leq \gamma - T) = \sum_{k=1}^{\infty} P(\sigma > k) = E[\sigma] < \infty$ , where the

inequality follows from the fact that  $U_k$  is the  $k^{th}$  renewal epoch of a delayed renewal process and hence the expected time for it to pass any constant threshold is finite.  $\square$

**B.2. Proof of Theorem 3** Consider the  $k^{th}$  modified system. Note that given the number of units that are in front of the tagged unit at the beginning of any idle period, its *remaining* sojourn time is independent of the past. For the  $k^{th}$  modified system, let  $\hat{\varphi}_{\nu,i}^k(\theta)$ ,  $1 \leq i \leq k+1$  denote the LT of the remaining sojourn time of the tagged unit at the beginning of the  $i^{th}$  idle period, given that it has  $\nu$  units in front of it. Then,  $\hat{\varphi}_{\nu,1}^k(\theta)$  is the LT of the remaining sojourn time of the unit at the beginning of the first idle period, given that the number of units moving to Stage 2 during the residual busy period is  $\nu \geq 0$ . Recall that  $M$  denotes the number of outdates during the residual busy period and  $\hat{r}_\nu(\theta)$  denotes the LT of the length of the residual busy period given  $M = \nu$ . Thus, we can write the LT of  $\tilde{S}_{2,k}$  as

$$E[e^{-\theta \tilde{S}_{2,k}}] = \sum_{\nu=0}^{\infty} P(M = \nu) \hat{r}_\nu(\theta) \hat{\varphi}_{\nu,1}^k(\theta). \quad (37)$$

We first express  $\hat{\varphi}_{\nu,1}^k(\theta)$  for  $k \geq 1$  (Proposition 6) by obtaining a recursive relation for  $\hat{\varphi}_{\nu,i}^k(\theta)$ ,  $1 \leq i \leq k+1$  (Lemma 2). With  $\hat{\varphi}_{\nu,1}^k(\theta)$  in hand and using (37) we then find the LT of  $\tilde{S}_{2,k}$ , which after taking  $k \rightarrow \infty$  and applying Theorem 1 gives us the LT of  $\tilde{S}_2$  presented in Theorem 3.

The first result is a recursive relation for  $\hat{\varphi}_{\nu,i}^k(\theta)$ , which we then use to obtain  $\hat{\varphi}_{\nu,1}^k(\theta)$ .

LEMMA 2. For  $1 \leq i \leq k$  and  $\nu \geq 0$  we have

$$\hat{\varphi}_{\nu,i}^k(\theta) = \sum_{l=0}^{\nu} \sum_{n=0}^{\infty} P(L=l) P(N=n) \hat{i}_l(\theta) \hat{z}_n(\theta) \hat{\varphi}_{\nu+n-l,i+1}^k(\theta) + \left( \frac{\mu}{\mu + \lambda + \theta} \right)^{\nu+1}. \quad (38)$$

*Proof of Lemma 2.* Consider the tagged unit at the beginning of the  $i^{th}$  idle period with  $\nu$  units in front of it. We condition on the number of demands arriving during the  $i^{th}$  idle period and consider two cases: (i) there are  $L=l \leq \nu$  and (ii) there are  $L \geq \nu+1$  demands during the  $i^{th}$  idle period. In case (i), the unit is not allocated during the  $i^{th}$  idle period and hence will be in the system at the beginning of the  $(i+1)^{st}$  idle period. Conditioning on the number of outdates during the  $(i+1)^{st}$  busy period  $N=n \geq 0$ , the time interval between the start of the  $i^{th}$  and  $(i+1)^{st}$  idle periods has LT  $\hat{i}_l(\theta) \hat{z}_n(\theta)$ . Also, the unit will have  $\nu+n-l$  units in front of it at the beginning of the  $(i+1)^{st}$  idle period and hence the LT of its remaining sojourn time at the beginning of the  $(i+1)^{st}$  idle period is  $\hat{\varphi}_{\nu+n-l,i+1}^k(\theta)$ . It follows that the remaining sojourn time of the unit at the beginning of the  $i^{th}$  idle period given  $N=n$  and  $L=l \leq \nu$  has LT  $\hat{i}_l(\theta) \hat{z}_n(\theta) \hat{\varphi}_{\nu+n-l,i+1}^k(\theta)$ . Removing the conditions on  $L$  and  $N$ , the first term on the right-hand side (RHS) follows. In case

(ii), the unit is allocated during the  $i^{\text{th}}$  idle period. Thus, its remaining sojourn is equal to the time it takes until the  $(\nu + 1)^{\text{st}}$  demand arrival. Note that given the idle period has not ended, the time between demand arrivals are exponentially distributed with rate  $\lambda + \mu$ . Thus, the time until the arrival of the  $(\nu + 1)^{\text{st}}$  demand is Erlang distributed with parameter  $(\lambda + \mu)$  and  $(\nu + 1)$  phases, and hence its LT is given by

$$\left( \frac{\lambda + \mu}{\mu + \lambda + \theta} \right)^{\nu+1}. \quad (39)$$

Also, from Proposition 5 the event  $\{L \geq \nu + 1\}$  has probability

$$\sum_{l=\nu+1}^{\infty} P(L=l) = 1 - \sum_{l=0}^{\nu} \left( \frac{\mu}{\mu + \lambda} \right)^l \left( \frac{\lambda}{\mu + \lambda} \right) = \left( \frac{\mu}{\mu + \lambda} \right)^{\nu+1},$$

which after being multiplied by (39) gives the second term on the RHS.  $\square$

Note that by definition of  $\hat{\varphi}_{\nu,i}^k(\theta)$  we have  $\hat{\varphi}_{\nu,k+1}^k(\theta) = 1$  for all  $\nu \geq 0$ . Thus, for a given  $k$  and starting from  $i = k$  one can use Lemma 2 to recursively solve for  $\hat{\varphi}_{\nu,1}^k(\theta)$ . Define the nested sum  $Y_{\nu}(d)$  for non-negative integers  $\nu$  and  $d$  as

$$Y_{\nu}(d) \equiv \sum_{j_0=0}^0 \xi_{j_0}(\theta) \sum_{j_1=0}^1 \xi_{j_1}(\theta) \sum_{j_2=0}^{2-j_1} \xi_{j_2}(\theta) \sum_{j_3=0}^{3-j_2-j_1} \xi_{j_3}(\theta) \cdots \sum_{j_{d-1}=0}^{(d-1)-j_{d-2}-\cdots-j_1} \xi_{j_{d-1}}(\theta) \left( \frac{\mu}{\lambda + \mu + \theta} \right)^{\nu+1} \binom{\nu+1}{d-j_{d-1}-\cdots-j_1}, \quad (40)$$

where we adopt the convention that an empty sum is equal to 0 and an empty product equal to 1. Note that  $d$  is the number of sums in  $Y_{\nu}(d)$ . The next proposition expresses  $\hat{\varphi}_{\nu,1}^k(\theta)$  as a function of  $k$ .

**PROPOSITION 6.** *The LT of the remaining sojourn of a unit at the beginning of the first idle period in the  $k^{\text{th}}$  modified system, given it has  $\nu \geq 0$  units in front of it, is given by*

$$\hat{\varphi}_{\nu,1}^k(\theta) = \sum_{i=0}^{k-1} Y_{\nu}(i) \left( 1 - (\hat{i}(\theta)\hat{z}(\theta))^{k-i} \right) \left( \frac{\lambda}{\lambda + \mu + \theta} \right)^i + (\hat{i}(\theta)\hat{z}(\theta))^k. \quad (41)$$

Before proving the result we need the following lemma.

**LEMMA 3.** *For  $\nu, i \geq 0$  the following identity holds:*

$$\sum_{l=0}^{\nu} \sum_{n=0}^{\infty} P(L=l)P(N=n)\hat{i}_l(\theta)\hat{z}_n(\theta)Y_{\nu+n-l}(i) = \left( \frac{\lambda}{\lambda + \mu + \theta} \right) Y_{\nu}(i+1). \quad (42)$$

*Proof.* Substituting for  $P(L=l), \hat{i}_l(\theta)$  and  $Y_{\nu+n-l}(i)$  into the LHS from (31), (32) and (40), respectively and changing the order of sums, after some simplifications we can rewrite the LHS as

$$\left(\frac{\mu}{\lambda+\mu+\theta}\right)^{\nu+1} \left(\frac{\lambda}{\lambda+\mu+\theta}\right) \xi_0(\theta) \sum_{j_1=0}^1 \xi_{j_1}(\theta) \sum_{j_2=0}^{2-j_1} \xi_{j_2}(\theta) \cdots \sum_{j_{i-1}=0}^{(i-1)-j_{i-2}-\cdots-j_1} \xi_{j_{i-1}}(\theta) \sum_{n=0}^{\infty} \left(\frac{\mu}{\lambda+\mu+\theta}\right)^n P(N=n) \hat{z}_n(\theta) \sum_{l=0}^{\nu} \binom{\nu+n-l+1}{i-j_{i-1}-\cdots-j_1}. \quad (43)$$

Using Lemma 4 the last sum is

$$\sum_{l=0}^{\nu} \binom{\nu+n-l+1}{i-j_{i-1}-\cdots-j_1} = \sum_{j_i=0}^{i-j_{i-1}-\cdots-j_1} \binom{\nu+1}{(i+1)-j_i-j_{i-1}-\cdots-j_1} \binom{n+1}{j_i},$$

which allows us to rewrite (43) as

$$\left(\frac{\mu}{\lambda+\mu+\theta}\right)^{\nu+1} \left(\frac{\lambda}{\lambda+\mu+\theta}\right) \xi_0(\theta) \sum_{j_1=0}^1 \xi_{j_1}(\theta) \sum_{j_2=0}^{2-j_1} \xi_{j_2}(\theta) \cdots \sum_{j_{i-1}=0}^{(i-1)-j_{i-2}-\cdots-j_1} \xi_{j_{i-1}}(\theta) \sum_{j_i=0}^{i-j_{i-1}-\cdots-j_1} \sum_{n=0}^{\infty} \left(\frac{\mu}{\lambda+\mu+\theta}\right)^n P(N=n) \hat{z}_n(\theta) \binom{n+1}{j_i} \binom{\nu+1}{(i+1)-j_i-\cdots-j_1}. \quad (44)$$

Rearranging the terms in (44) and using (59) we arrive at the RHS:

$$\left(\frac{\lambda}{\lambda+\mu+\theta}\right) \xi_0(\theta) \sum_{j_1=0}^1 \xi_{j_1}(\theta) \sum_{j_2=0}^{2-j_1} \xi_{j_2}(\theta) \cdots \sum_{j_{i-1}=0}^{(i-1)-j_{i-2}-\cdots-j_1} \xi_{j_{i-1}}(\theta) \sum_{j_i=0}^{i-j_{i-1}-\cdots-j_1} \xi_{j_i}(\theta) \left(\frac{\mu}{\lambda+\mu+\theta}\right)^{\nu+1} \binom{\nu+1}{(i+1)-j_i-\cdots-j_1} = \left(\frac{\lambda}{\lambda+\mu+\theta}\right) Y_{\nu}(i+1).$$

This completes the proof.  $\square$

*Proof of Proposition 6.* The proof is by induction on  $k$ . For  $k=1$ , noting that  $\hat{\varphi}_{\nu,k+1}^k(\theta) = 1$  and using (38) we have

$$\hat{\varphi}_{\nu,1}^1(\theta) = \sum_{l=0}^{\nu} P(L=l) \hat{i}_l(\theta) \sum_{n=0}^{\infty} P(N=n) \hat{z}_n(\theta) + \left(\frac{\mu}{\mu+\lambda+\theta}\right)^{\nu+1}. \quad (45)$$

Noting that

$$\sum_{l=0}^{\nu} P(L=l) \hat{i}_l(\theta) = \left(\frac{\lambda}{\mu+\lambda}\right) \left(1 - \left(\frac{\mu}{\mu+\lambda+\theta}\right)^{\nu+1}\right), \quad (46)$$

and using (30), we can simplify (45) to obtain

$$\begin{aligned} \hat{\varphi}_{\nu,1}^1(\theta) &= \left(1 - \left(\frac{\mu}{\mu+\lambda+\theta}\right)^{\nu+1}\right) \hat{i}(\theta) \hat{z}(\theta) + \left(\frac{\mu}{\mu+\lambda+\theta}\right)^{\nu+1} \\ &= \left(\frac{\mu}{\mu+\lambda+\theta}\right)^{\nu+1} (1 - \hat{i}(\theta) \hat{z}(\theta)) + \hat{i}(\theta) \hat{z}(\theta) = Y_{\nu}(0) (1 - \hat{i}(\theta) \hat{z}(\theta)) + \hat{i}(\theta) \hat{z}(\theta), \end{aligned}$$

which establishes (41) for  $k = 1$ . No assume that (41) holds for some  $k \geq 1$ . From (38) we have

$$\hat{\varphi}_{\nu,1}^{k+1}(\theta) = \sum_{l=0}^{\nu} \sum_{n=0}^{\infty} P(L=l)P(N=n)\hat{i}_l(\theta)\hat{z}_n(\theta)\hat{\varphi}_{\nu+n-l,2}^{k+1}(\theta) + \left(\frac{\mu}{\mu+\lambda+\theta}\right)^{\nu+1}. \quad (47)$$

Note that by construction of the  $k^{th}$  modified system we have  $\hat{\varphi}_{\nu+n-l,2}^{k+1}(\theta) = \hat{\varphi}_{\nu+n-l,1}^k(\theta)$ . Substituting  $\hat{\varphi}_{\nu+n-l,1}^k(\theta)$  for  $\hat{\varphi}_{\nu+n-l,2}^{k+1}(\theta)$  in (47) and using (41) we get

$$\begin{aligned} \hat{\varphi}_{\nu,1}^{k+1}(\theta) &= \sum_{l=0}^{\nu} \sum_{n=0}^{\infty} P(L=l)P(N=n)\hat{i}_l(\theta)\hat{z}_n(\theta) \\ &\quad \times \left( \sum_{i=0}^{k-1} Y_{\nu+n-l}(i) \left(1 - (\hat{i}(\theta)\hat{z}(\theta))^{k-i}\right) \left(\frac{\lambda}{\lambda+\mu+\theta}\right)^i + (\hat{i}(\theta)\hat{z}(\theta))^k \right) + \left(\frac{\mu}{\mu+\lambda+\theta}\right)^{\nu+1} \\ &= \sum_{l=0}^{\nu} \sum_{n=0}^{\infty} P(L=l)P(N=n)\hat{i}_l(\theta)\hat{z}_n(\theta) \sum_{i=0}^{k-1} Y_{\nu+n-l}(i) \left(1 - (\hat{i}(\theta)\hat{z}(\theta))^{k-i}\right) \left(\frac{\lambda}{\lambda+\mu+\theta}\right)^i \\ &\quad + \sum_{l=0}^{\nu} \sum_{n=0}^{\infty} P(L=l)P(N=n)\hat{i}_l(\theta)\hat{z}_n(\theta) (\hat{i}(\theta)\hat{z}(\theta))^k + \left(\frac{\mu}{\mu+\lambda+\theta}\right)^{\nu+1}. \end{aligned} \quad (48)$$

We start with the first term in (48). Rearranging the terms and applying Lemma 3 we have

$$\begin{aligned} &\sum_{l=0}^{\nu} \sum_{n=0}^{\infty} P(L=l)P(N=n)\hat{i}_l(\theta)\hat{z}_n(\theta) \sum_{i=0}^{k-1} Y_{\nu+n-l}(i) \left(1 - (\hat{i}(\theta)\hat{z}(\theta))^{k-i}\right) \left(\frac{\lambda}{\lambda+\mu+\theta}\right)^i \\ &= \sum_{i=0}^{k-1} \sum_{l=0}^{\nu} \sum_{n=0}^{\infty} P(L=l)P(N=n)\hat{i}_l(\theta)\hat{z}_n(\theta) Y_{\nu+n-l}(i) \left(1 - (\hat{i}(\theta)\hat{z}(\theta))^{k-i}\right) \left(\frac{\lambda}{\lambda+\mu+\theta}\right)^i \\ &= \sum_{i=0}^{k-1} \left(\frac{\lambda}{\lambda+\mu+\theta}\right) Y_{\nu}(i+1) \left(1 - (\hat{i}(\theta)\hat{z}(\theta))^{k-i}\right) \left(\frac{\lambda}{\lambda+\mu+\theta}\right)^i \\ &= \sum_{i=1}^{(k+1)-1} Y_{\nu}(i) \left(1 - (\hat{i}(\theta)\hat{z}(\theta))^{(k+1)-i}\right) \left(\frac{\lambda}{\lambda+\mu+\theta}\right)^i. \end{aligned} \quad (49)$$

The second term in (48) can be evaluated by rearranging the sums and using (46):

$$\sum_{l=0}^{\nu} \sum_{n=0}^{\infty} P(L=l)P(N=n)\hat{i}_l(\theta)\hat{z}_n(\theta) (\hat{i}(\theta)\hat{z}(\theta))^k = \left(1 - \left(\frac{\mu}{\mu+\lambda+\theta}\right)^{\nu+1}\right) (\hat{i}(\theta)\hat{z}(\theta))^{k+1}. \quad (50)$$

Finally, substituting (49) and (50) into (48) we get

$$\begin{aligned} \hat{\varphi}_{\nu,1}^{k+1}(\theta) &= \left(\frac{\mu}{\mu+\lambda+\theta}\right)^{\nu+1} \left(1 - (\hat{i}(\theta)\hat{z}(\theta))^{k+1}\right) \\ &\quad + \sum_{i=1}^{(k+1)-1} Y_{\nu}(i) \left(1 - (\hat{i}(\theta)\hat{z}(\theta))^{(k+1)-i}\right) \left(\frac{\lambda}{\lambda+\mu+\theta}\right)^i + (\hat{i}(\theta)\hat{z}(\theta))^{k+1} \\ &= \sum_{i=0}^{(k+1)-1} Y_{\nu}(i) \left(1 - (\hat{i}(\theta)\hat{z}(\theta))^{(k+1)-i}\right) \left(\frac{\lambda}{\lambda+\mu+\theta}\right)^i + (\hat{i}(\theta)\hat{z}(\theta))^{k+1}. \end{aligned}$$

This completes the proof.  $\square$

*Proof of Theorem 3.* Substituting  $\hat{\varphi}_{\nu,1}^k(\theta)$  from (41) into (37) we have

$$E[e^{-\theta\tilde{S}_{2,k}}] = \sum_{i=0}^{k-1} \sum_{\nu=0}^{\infty} P(M=\nu)\hat{r}_{\nu}(\theta)Y_{\nu}(i) \left(1 - (\hat{i}(\theta)\hat{z}(\theta))^{k-i}\right) \left(\frac{\lambda}{\lambda+\mu+\theta}\right)^i + \sum_{\nu=0}^{\infty} P(M=\nu)\hat{r}_{\nu}(\theta)(\hat{i}(\theta)\hat{z}(\theta))^k. \quad (51)$$

We deal with the two terms separately. First, substituting for  $Y_{\nu}(i)$  in the first term and using Lemma 5, we have

$$\begin{aligned} & \sum_{\nu=0}^{\infty} \sum_{i=0}^{k-1} P(M=\nu)\hat{r}_{\nu}(\theta)Y_{\nu}(i) \left(1 - (\hat{i}(\theta)\hat{z}(\theta))^{k-i}\right) \left(\frac{\lambda}{\lambda+\mu+\theta}\right)^i \\ &= \sum_{i=0}^{k-1} \left[ \xi_0(\theta) \sum_{j_1=0}^1 \xi_{j_1}(\theta) \cdots \sum_{j_{i-1}=0}^{(i-1)-j_{i-2}-\cdots-j_1} \xi_{j_{i-1}}(\theta) \sum_{\nu=0}^{\infty} P(M=\nu)\hat{r}_{\nu}(\theta) \left(\frac{\mu}{\lambda+\mu+\theta}\right)^{\nu+1} \binom{\nu+1}{i-j_{i-1}-\cdots-j_1} \right] \\ & \quad \times \left(1 - (\hat{i}(\theta)\hat{z}(\theta))^{k-i}\right) \left(\frac{\lambda}{\lambda+\mu+\theta}\right)^i = \sum_{\nu=0}^{\infty} P(M=\nu)\hat{r}_{\nu}(\theta) \left(\frac{\mu}{\lambda+\mu+\theta}\right)^{\nu+1} \left(1 - (\hat{i}(\theta)\hat{z}(\theta))^k\right) \\ & + \sum_{i=1}^{k-1} \left[ \xi_0(\theta) \sum_{j_1=0}^1 \xi_{j_1}(\theta) \cdots \sum_{j_{i-1}=0}^{(i-1)-j_{i-2}-\cdots-j_1} \xi_{j_{i-1}}(\theta) \sum_{\nu=0}^{\infty} P(M=\nu)\hat{r}_{\nu}(\theta) \left(\frac{\mu}{\lambda+\mu+\theta}\right)^{\nu+1} \binom{\nu+1}{i-j_{i-1}-\cdots-j_1} \right] \\ & \quad \times \left(1 - (\hat{i}(\theta)\hat{z}(\theta))^{k-i}\right) \left(\frac{\lambda}{\lambda+\mu+\theta}\right)^i = \left(1 - (\hat{i}(\theta)\hat{z}(\theta))^k\right) \beta_0(\theta) \\ & + \sum_{i=1}^{k-1} \left[ \xi_0(\theta) \sum_{j_1=0}^1 \xi_{j_1}(\theta) \cdots \sum_{j_{i-1}=0}^{(i-1)-j_{i-2}-\cdots-j_1} \xi_{j_{i-1}}(\theta) \beta_{i-j_{i-1}-\cdots-j_1}(\theta) \left(1 - (\hat{i}(\theta)\hat{z}(\theta))^{k-i}\right) \left(\frac{\lambda}{\lambda+\mu+\theta}\right)^i \right]. \quad (52) \end{aligned}$$

Using the definition of  $X(d, w)$  in (18) for  $w = 1$ , (52) becomes

$$\left(1 - (\hat{i}(\theta)\hat{z}(\theta))^k\right) \beta_0(\theta) + \xi_0(\theta) \sum_{i=1}^{k-1} X(i, 1) \left(1 - (\hat{i}(\theta)\hat{z}(\theta))^{k-i}\right) \left(\frac{\lambda}{\lambda+\mu+\theta}\right)^i. \quad (53)$$

Next, the second term in (51) is simply

$$\sum_{\nu=0}^{\infty} P(M=\nu)\hat{r}_{\nu}(\theta)(\hat{i}(\theta)\hat{z}(\theta))^k = (\hat{i}(\theta)\hat{z}(\theta))^k \hat{r}(\theta). \quad (54)$$

Substituting (53) and (54) back into (51) we have

$$\begin{aligned} E[e^{-\theta\tilde{S}_{2,k}}] &= (\hat{i}(\theta)\hat{z}(\theta))^k \hat{r}(\theta) + \left(1 - (\hat{i}(\theta)\hat{z}(\theta))^k\right) \beta_0(\theta) \\ & \quad + \xi_0(\theta) \sum_{i=1}^{k-1} X(i, 1) \left(1 - (\hat{i}(\theta)\hat{z}(\theta))^{k-i}\right) \left(\frac{\lambda}{\lambda+\mu+\theta}\right)^i \\ &= (\hat{i}(\theta)\hat{z}(\theta))^k \hat{r}(\theta) + \left(1 - (\hat{i}(\theta)\hat{z}(\theta))^k\right) \beta_0(\theta) \\ & \quad + \xi_0(\theta) \sum_{i=1}^{k-1} X(i, 1) \left(\frac{\lambda}{\lambda+\mu+\theta}\right)^i - \xi_0(\theta) \sum_{i=1}^{k-1} X(i, 1) (\hat{i}(\theta)\hat{z}(\theta))^{k-i} \left(\frac{\lambda}{\lambda+\mu+\theta}\right)^i. \quad (56) \end{aligned}$$

Letting  $k \rightarrow \infty$  in (56), the first term goes to 0 and the second term converges to  $\beta_0(\theta)$ . Therefore, to get the final result it remains to show that for all  $\theta > 0$  the last term converges to 0 as  $k \rightarrow \infty$ . To this

end, consider  $E[e^{-\theta \tilde{S}_{2,k}}]$  in (55) and note that it converges if and only if the sequence  $\{F_k\}_{k \geq 2}$  with  $F_k \equiv \sum_{i=1}^{k-1} X(i, 1) \left(1 - (\hat{i}(\theta) \hat{z}(\theta))^{k-i}\right) \left(\frac{\lambda}{\lambda + \mu + \theta}\right)^i$ , is convergent. However, from Theorem 1 we know that  $E[e^{-\theta \tilde{S}_{2,k}}]$  converges and therefore  $\{F_k\}$  is indeed convergent. Thus, we have  $|F_{k+1} - F_k| \rightarrow 0$  as  $k \rightarrow \infty$ . Now observe that

$$\begin{aligned} F_{k+1} - F_k &= \sum_{i=1}^k X(i, 1) \left(1 - (\hat{i}(\theta) \hat{z}(\theta))^{k+1-i}\right) \left(\frac{\lambda}{\lambda + \mu + \theta}\right)^i - \sum_{i=1}^{k-1} X(i, 1) \left(1 - (\hat{i}(\theta) \hat{z}(\theta))^{k-i}\right) \left(\frac{\lambda}{\lambda + \mu + \theta}\right)^i \\ &= X(k, 1) (1 - \hat{i}(\theta) \hat{z}(\theta)) \left(\frac{\lambda}{\lambda + \mu + \theta}\right)^k + (1 - \hat{i}(\theta) \hat{z}(\theta)) \sum_{i=1}^{k-1} X(i, 1) (\hat{i}(\theta) \hat{z}(\theta))^{k-i} \left(\frac{\lambda}{\lambda + \mu + \theta}\right)^i \\ &= (1 - \hat{i}(\theta) \hat{z}(\theta)) \sum_{i=1}^k X(i, 1) (\hat{i}(\theta) \hat{z}(\theta))^{k-i} \left(\frac{\lambda}{\lambda + \mu + \theta}\right)^i, \end{aligned}$$

and hence,  $\lim_{k \rightarrow \infty} \sum_{i=1}^k X(i, 1) (\hat{i}(\theta) \hat{z}(\theta))^{k-i} \left(\frac{\lambda}{\lambda + \mu + \theta}\right)^i = 0$ , for all  $\theta > 0$ . Finally, noting that for  $k \geq 2$ ,  $\sum_{i=1}^k X(i, 1) (\hat{i}(\theta) \hat{z}(\theta))^{k-i} \left(\frac{\lambda}{\lambda + \mu + \theta}\right)^i \geq \sum_{i=1}^{k-1} X(i, 1) (\hat{i}(\theta) \hat{z}(\theta))^{k-i} \left(\frac{\lambda}{\lambda + \mu + \theta}\right)^i$ , we can conclude that the last term in (56) vanishes as  $k \rightarrow \infty$ , which completes the proof.  $\square$

### C. Side Lemmas

LEMMA 4. For  $\omega \geq 0$  we have

$$\sum_{l=0}^v \binom{v+n-l+1}{\omega} = \sum_{\kappa=0}^{\omega} \binom{v+1}{\omega+1-\kappa} \binom{n+1}{\kappa}. \quad (57)$$

*Proof.* To save space in this proof we use  $\mathcal{C}(a, b)$  to denote the Binomial coefficient  $\binom{a}{b}$ . Starting from the left-hand side (LHS) of (57) we first claim that

$$\sum_{l=0}^v \mathcal{C}(v+n-l+1, \omega) = \mathcal{C}(v+n+2, \omega+1) - \mathcal{C}(n+1, \omega+1), \quad (58)$$

which can be proved by induction on  $v$ . For  $v = 0$  (58) becomes  $\mathcal{C}(n+1, \omega) = \mathcal{C}(n+1, \omega+1) - \mathcal{C}(n+1, \omega+1)$ , which is the Pascal's recurrence (see, e.g., Gross 2007, page 218). Now assume for some  $v \geq 1$  that  $\sum_{l=0}^{v-1} \mathcal{C}(v+n-l, \omega) = \mathcal{C}(v+n+1, \omega+1) - \mathcal{C}(n+1, \omega+1)$ , then

$$\begin{aligned} \sum_{l=0}^v \mathcal{C}(v+n-l+1, \omega) &= \mathcal{C}(v+n+1, \omega) + \sum_{l=1}^v \mathcal{C}(v+n-l+1, \omega) = \mathcal{C}(v+n+1, \omega) + \sum_{l=0}^{v-1} \mathcal{C}(v+n-l, \omega) \\ &= \mathcal{C}(v+n+1, \omega) + \mathcal{C}(v+n+1, \omega+1) - \mathcal{C}(n+1, \omega+1) \quad (\text{induction hypothesis}) \\ &= \mathcal{C}(v+n+2, \omega+1) - \mathcal{C}(n+1, \omega+1), \quad (\text{Pascal's recurrence}) \end{aligned}$$

as claimed. Next, applying Vandermonde's convolution (see, e.g., Gross 2007, page 226) to the first term we get  $\mathcal{C}(v+n+2, \omega+1) = \sum_{\kappa=0}^{\omega+1} \mathcal{C}(v+1, \omega+1-\kappa) \mathcal{C}(n+1, \kappa) = \sum_{\kappa=0}^{\omega} \mathcal{C}(v+1, \omega+1-\kappa) \mathcal{C}(n+1, \kappa) + \mathcal{C}(n+1, \omega+1)$ , which after substituting in (58) gives (57).  $\square$

LEMMA 5. For  $i \geq 0$  we have

$$\sum_{n=0}^{\infty} \left( \frac{\mu}{\lambda + \mu + \theta} \right)^n P(N = n) \hat{z}_n(\theta) \binom{n+1}{i} = \xi_i(\theta), \quad (59)$$

and

$$\sum_{m=0}^{\infty} \left( \frac{\mu}{\lambda + \mu + \theta} \right)^{m+1} P(M = m) \hat{r}_m(\theta) \binom{m+1}{i} = \beta_i(\theta) \quad (60)$$

with  $\xi_i(\theta)$  and  $\beta_i(\theta)$  given in (16) and (17), respectively.

*Proof.* We give a proof for (60); (59) can be obtained similarly. Substituting for  $P(M = l)$  and  $\hat{r}_m(\theta)$  from (24) and (25) into (60), and using the definitions in (15) the LHS becomes

$$c_1(\theta) \sum_{m=0}^{\infty} (c_2(\theta))^m \binom{m+1}{i},$$

establishing (60) for  $i = 0$ . To obtain the formula for  $i \geq 1$ , note that

$$\begin{aligned} \frac{i!}{(1 - c_2(\theta))^{i+1}} &= \frac{d^i}{d(c_2(\theta))^i} \sum_{m=0}^{\infty} (c_2(\theta))^m = \sum_{m=0}^{\infty} \frac{d^i}{d(c_2(\theta))^i} (c_2(\theta))^m \\ &= \sum_{m=0}^{\infty} m(m-1) \cdots (m-i+1) (c_2(\theta))^{m-i} \\ &= \sum_{m=i}^{\infty} m(m-1) \cdots (m-i+1) (c_2(\theta))^{m-i}. \end{aligned}$$

Multiplying both sides by  $c_2(\theta)^{i-1}/i!$  yields:

$$\frac{(c_2(\theta))^{i-1}}{(1 - c_2(\theta))^{i+1}} = \sum_{m=i}^{\infty} (c_2(\theta))^{m-1} \binom{m}{i} = \sum_{m=i-1}^{\infty} (c_2(\theta))^m \binom{m+1}{i} = \sum_{m=0}^{\infty} (c_2(\theta))^m \binom{m+1}{i},$$

from which (60) follows.  $\square$
